# Supplementary material for: Technical framework for wastewater-based epidemiology of SARS-CoV-2 based on relative quantification via qPCR
Source: Research Square preprint supplement (doi:10.21203/rs.3.rs-128176/v1), 2020-12-22
Supplement: Supplementary file 1 [file 3f3388a89da01476fd1bda5d.docx]

**SUPPLEMENTARY INFORMATION**

**Technical framework for wastewater-based epidemiology of SARS-CoV-2 based on relative quantification via qPCR**

**Jinyong Wu1, Zizheng Wang2, Yufei Lin1, Lihua Zhang1, Jing Chen1, Panyu Li1, Wenbin Liu1, Yabo Wang1, Changhong Yao1, Kun Yang1***

1. Department of Pharmaceutical & Biological Engineering, School of Chemical Engineering, Sichuan University, Chengdu 610065, China.
2. West China School of Stomatology, Sichuan University, Chengdu 610041, China.

*Correspondence to:

Kun Yang

cookyoung@scu.edu.cn

**Supplementary Information Table of Contents**

| **Supplementary Table** |  |
| --- | --- |
| Supplementary Table S1. Information of RT-qPCR primer−probe sets analyzed in this work. | 3 |
| **Supplementary Figures** |  |
| Supplementary Figure S1. Illustration of the positions of RT-qPCR primer−probe sets in the SARS-CoV-2 genome. | 4 |
| **Supplementary Datasets** |  |
| Supplementary Dataset S1. Statistics of numbers of point mutation sequences (among analyzed 2257 sequences) in the target binding region of primer/probe sets.  Supplementary dataset S2. Calculated mutation rate for each site within the target binding region of primers/probes (n=2257). | 5  5 |
| **Other supplementary materials** |  |
| FASTA file for genome sequence alignment of SARS-CoV-2.  Acknowledgement table for downloaded genome sequences from GISAID EpiCoV database. | 6  6 |
| **Supplementary References** | 7 |
|  |  |

**Supplementary Table S1. Information of RT-qPCR primer−probe sets analyzed in this work [1, 2].**

| **Institutes** | **Target** | **Name** | **Sequence (5’-3’)** | **Reference** |
| --- | --- | --- | --- | --- |
| **China CDC** | ORF1ab | ORF1ab-F | CCC TGT GGG TTT TAC ACT TAA | [3] |
|  |  | ORF1ab-P | FAM−CCG TCT GCG GTA TGT GGA AAG GTT ATG G−BHQ1 |  |
|  |  | ORF1ab-R | ACG ATT GTG CAT CAG CTG A |  |
|  | N | N-F | GGG GAA CTT CTC CTG CTA GAA T |  |
|  |  | N-P | FAM−TTG CTG CTG CTT GAC AGA TT−BHQ1 |  |
|  |  | N-R | CAG ACA TTT TGC TCT CAA GCT G |  |
| **France Pasteur** | RdRP-IP2 | RdRp-IP2_F | ATG AGC TTA GTC CTG TTG | [4] |
|  |  | RdRp-IP2_P | FAM−AGA TGT CTT GTG CTG CCG GTA−BHQ1 |  |
|  |  | RdRp-IP2_R | CTC CCT TTG TTG TGT TGT |  |
|  | RdRP-IP4 | RdRp-IP4_F | GGT AAC TGG TAT GAT TTC G |  |
|  |  | RdRp-IP4_P | FAM−TCA TAC AAA CCA CGC CAG G−BHQ1 |  |
|  |  | RdRp-IP4_R | CTG GTC AAG GTT AAT ATA GG |  |
|  | E | Pasteur-E_F | ACA GGT ACG TTA ATA GTT AAT AGC GT |  |
|  |  | Pasteur-E_P | FAM−ACA CTA GCC ATC CTT ACT GCG CTT CG−BHQ1 |  |
|  |  | Pasteur-E_R | ATA TTG CAG CAG TAC GCA CAC A |  |
| **Germany Charité** | RdRP | RdRp_SARSr-F | GTG ARA TGG TCA TGT GTG GCG G | [5] |
|  |  | RdRp_SARSr-P2 | FAM−CAG GTG GAA CCT CAT CAG GAG ATG C−BHQ1 |  |
|  |  | RdRp_SARSr-R | CAR(A)ATG TTA AA**S(A)** ACA CTA TTA GCA TA **(Mismatch)b** |  |
|  | E | E_Sarbeco_F | ACAGGTACGTTAATAGTTAATAGCGT |  |
|  |  | E_Sarbeco_P1 | FAM-ACACTAGCCATCCTTACTGCGCTTCG-BBQ |  |
|  |  | E_Sarbeco_R | ATATTGCAGCAGTACGCACACA |  |
|  | N | N_Sarbeco_F | CACATTGGCACCCGCAATC |  |
|  |  | N_Sarbeco_P | FAM-ACTTCCTCAAGGAACAACATTGCCA-BBQ |  |
|  |  | N_Sarbeco_R | GAGGAACGAGAAGAGGCTTG |  |
| **HKU Med.** | ORF1b | HKU-ORF1bnsp14F | TGG GGY TTT ACR GGT AAC CT | [6] |
|  |  | HKU-ORF1bnsp14P | FAM−TAG TTG TGA TGC WAT CAT GAC TAG−BHQ1 |  |
|  |  | HKU-ORF1bnsp14R | AAC RCG CTT AAC AAA GCA CTC |  |
|  | N | HKU-NF | TAA TCA GAC AAG GAA CTG ATT A |  |
|  |  | HKU-NP | FAM−GCA AAT TGT GCA ATT TGC GG−BHQ1 |  |
|  |  | HKU-NR | CGA AGG TGT GAC TTC CAT G |  |
| **HKU SKL of EIDa** | RdRp/Hel | RdRp/Hel_F | CGC ATA CAG TCT TRC AGG CT | [7] |
|  |  | RdRp/Hel_P | FAM−TTA AGA TGT GGT GCT TGC ATA CGT AGA C-BHQ1 |  |
|  |  | RdRp/Hel_R | **G(A)**TG TGA TGT TGA WAT GAC ATG GTC **(Mismatch) b** |  |
|  | S | Chan-S_F | CCT ACT AAA TTA AAT GAT CTC TGC TTT ACT |  |
|  |  | Chan-S_P | FAM−CGC TCC AGG GCA AAC TGG AAA G−BHQ1 |  |
|  |  | Chan-S_R | CAA GCT ATA ACG CAG CCT GTA |  |
|  | N | Chan-N_F | GCG TTC TTC GGA ATG TCG |  |
|  |  | Chan-N_P | FAM−AAC GTG GTT GAC CTA CAC AGS T−BHQ1 |  |
|  |  | Chan-N_R | TTG GAT CTT TGT CAT CCA ATT TG |  |
| **Japan NIID** | N | NIID_2019-nCOV_N_F2 | AAA TTT TGG GGA CCA GGA AC | [8] |
|  |  | NIID_2019-nCOV_N_P2 | FAM−ATG TCG CGC ATT GGC ATG GA− BHQ1 |  |
|  |  | NIID_2019-nCOV_N_R2 | TGG CA**G(C)** CTG TGT AGG TCA AC **(Mismatch) b** |  |
| **Thailand NIH** | N | WH-NIC N-F | CGT TTG GTG GAC CCT CAG AT | [9] |
|  |  | WH-NIC N-P | FAM−CAA CTG GCA GTA ACC A−BHQ1 |  |
|  |  | WH-NIC N-R | CCC CAC TGC GTT CTC CAT T |  |
| **US CDC** | N | 2019-nCoV_N1-F | GAC CCC AAA ATC AGC GAA AT | [10] |
|  |  | 2019-nCoV_N1-P | FAM−ACC CCG CAT TAC GTT TGG TGG ACC−BHQ1 |  |
|  |  | 2019-nCoV_N1-R | TCT GGT TAC TGC CAG TTG AAT CTG |  |
|  |  | 2019-nCoV_N2-F | TTA CAA ACA TTG GCC GCA AA |  |
|  |  | 2019-nCoV_N2-P | FAM−ACA ATT TGC CCC CAG CGC TTC AG−BHQ1 |  |
|  |  | 2019-nCoV_N2-R | GCG CGA CAT TCC GAA GAA |  |
|  |  | 2019-nCoV_N3-F | GGG AGC CTT GAA TAC ACC AAA A |  |
|  |  | 2019-nCoV_N3-P | FAM−AYC ACA TTG GCA CCC GCA ATC CTG−BHQ1 |  |
|  |  | 2019-nCoV_N3-R | TGT AGC ACG ATT GCA GCA TTG |  |

**a**: SKL of EID: State Key Laboratory of Emerging Infectious Diseases

**b**: The underlined bold letters within these primers indicate mismatched sites to the PCR template NC_045112.

**Supplementary Figure S1. Illustration of the positions of RT-qPCR primer−probe sets in the SARS-CoV-2 genome.** Dots of different colors are used to distinguish different primer/probe sets close to each other.


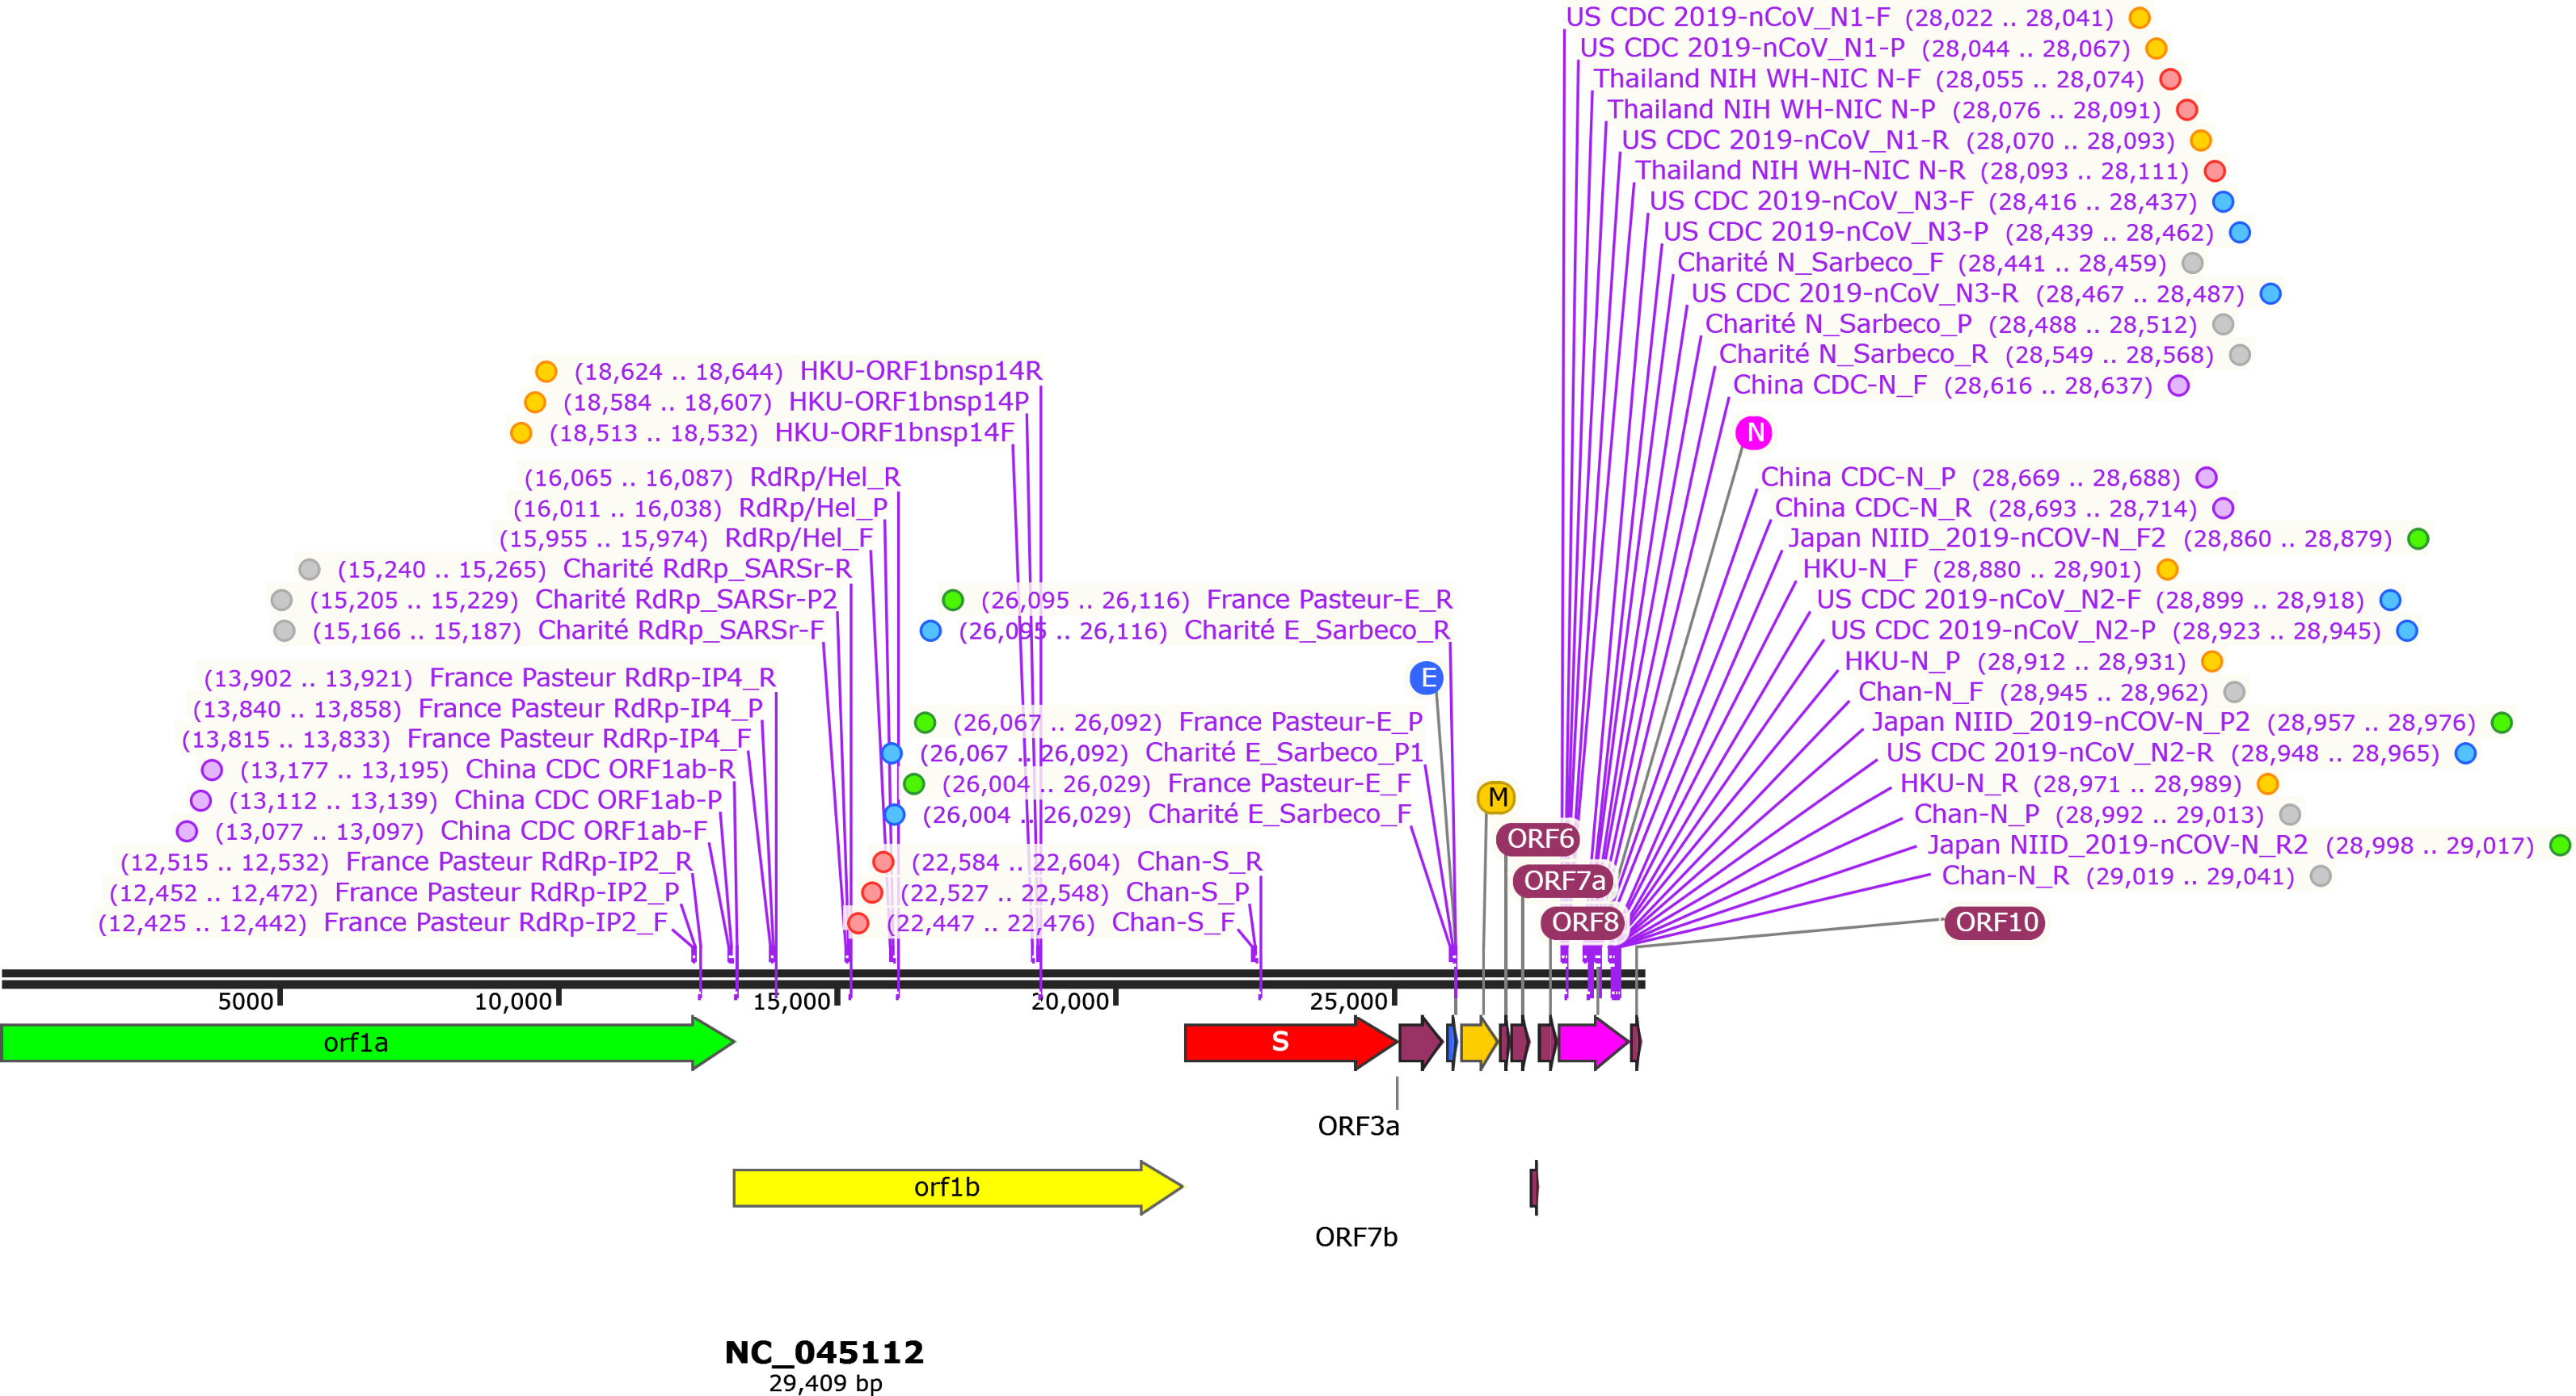


**Supplementary datasets**

**Supplementary dataset S1. Statistics of numbers of point mutation sequences (among analyzed 2257 sequences) in the target binding region of primer/probe sets.**

**Supplementary dataset S2. Calculated mutation rate for each site within the target binding region of primers/probes (n=2257).**

Two supplementary datasets are provided in separate excel spreadsheets (Supplementary Datasets.xlsx).

**Other supplementary materials**

1. **FASTA file for genome sequence alignment of SARS-CoV-2** (SARS-CoV-2 Align. fas)**.**
2. **Acknowledgement table for downloaded genome sequences from GISAID EpiCoV database (**gisaid_cov2020_acknowledgement_table.xls**).**

Other supplementary materials are provided as separated files.

**Supplementary references**

1. Jung, Y., et al., *Comparative Analysis of Primer-Probe Sets for RT-qPCR of COVID-19 Causative Virus (SARS-CoV-2).* ACS Infect Dis, 2020. **6**(9): p. 2513-2523.

2. Gand, M., et al., *Use of Whole Genome Sequencing Data for a First in Silico Specificity Evaluation of the RT-qPCR Assays Used for SARS-CoV-2 Detection.* Int J Mol Sci, 2020. **21**(15).

3. Prevention, N.I.f.V.D.C.a., *Specific primers and probes for detection 2019 novel coronavirus.* 2020.

4. WHO, *WHO Coronavirus Disease (COVID-19) Technical Guidance: Laboratory Testing for 2019-nCoV in Humans.* 2020.

5. Corman, V.M., et al., *Detection of 2019 novel coronavirus (2019-nCoV) by real-time RT-PCR.* Euro Surveill, 2020. **25**: p. 2000045.

6. Chu, D.K.W., et al., *Molecular Diagnosis of a Novel Coronavirus (2019-nCoV) Causing an Outbreak of Pneumonia.* Clin Chem, 2020. **66**(4): p. 549-555.

7. Chan, J.F., et al., *Improved Molecular Diagnosis of COVID-19 by the Novel, Highly Sensitive and Specific COVID-19-RdRp/Hel Real-Time Reverse Transcription-PCR Assay Validated In Vitro and with Clinical Specimens.* J Clin Microbiol, 2020. **58**(5).

8. Naganori, N., et al., *Detection of second case of 2019-nCoV infection in Japan.* 2020.

9. Sciences, D.o.M. and M.o.P. Health, *Diagnostic detection of Novel coronavirus 2019 by Real time RTPCR.* 2020.

10. CDC, U., *2019-Novel Coronavirus (2019-nCoV) Real-time rRT-PCR Panel: Primers and Probes.* 2020.
