# Supplementary material for: Technical framework for wastewater-based epidemiology of SARS-CoV-2 based on relative quantification via qPCR
Source: Research Square preprint supplement (doi:10.21203/rs.3.rs-128176/v1), 2020-12-22
Supplement: Supplementary file 2 [file ce7f13bf77e18fe35d4bff46.xlsx]

## Sheet: Dataset S1
Dataset S1. Statistics of numbers of point mutation sequences (among analyzed 2257 sequences) in the target binding region of primer/probe sets. The sequence of each primer/probe is shown in Supplementary Table S1
total	P1	P2	P3	P4	P5	P6	P7	P8	P9	P10	P11	P12	P13	P14	P15	P16	P17	P18	P19	P20	P21	P22	P23	P24	P25	P26	P27	P28	P29	P30	T
RdRp/Hel_F	0	0	1	0	0	0	0	0	0	0	0	0	0	0	0	0	0	0	0	0	0	0	0	0	0	0	0	0	0	0	1
RdRp/Hel_P	0	0	0	0	0	0	0	0	0	0	0	0	0	6	0	0	0	1	0	0	0	0	0	0	0	0	0	0	0	0	7
RdRp/Hel_R*	0	0	0	0	0	1	0	0	0	0	0	0	1	0	1	0	0	0	0	0	0	0	0	0	0	0	0	0	0	0	2
Chan-N_F	0	0	2	0	0	0	0	0	0	0	0	0	0	0	0	0	0	1	0	0	0	0	0	0	0	0	0	0	0	0	3
Chan-N_P	0	0	0	0	0	1	0	0	0	1	0	0	0	0	0	2	0	1	0	0	0	0	0	0	0	0	0	0	0	0	5
Chan-N_R*	1	0	0	0	0	0	1	4	0	0	0	0	2	0	0	0	0	1	0	6	0	0	0	0	0	0	0	0	0	0	15
Chan-S_F	0	0	0	0	0	0	0	0	0	0	0	0	0	0	0	0	0	0	0	0	0	0	0	0	0	0	0	0	0	0	0
Chan-S_P	2	0	0	1	0	0	1	0	0	1	1	0	0	0	0	0	1	0	0	0	0	0	0	0	0	0	0	0	0	0	5
Chan-S_R*	0	0	0	1	0	0	1	0	0	1	0	0	0	0	0	0	1	0	0	0	0	0	0	0	0	0	0	0	0	0	2
Charite RdRp_SARSr-F	0	0	0	0	0	0	0	1	0	0	0	0	0	1	0	0	0	0	0	0	0	0	0	0	0	0	0	0	0	0	2
Charite RdRp_SARSr-P2	0	0	0	0	0	0	0	1	0	0	2	0	0	0	0	0	0	0	0	0	0	0	0	0	0	0	0	0	0	0	3
Charite RdRp_SARSr-R*	0	0	0	0	0	0	0	0	0	0	0	0	0	0	1	0	0	0	0	0	0	0	0	0	0	0	0	0	0	0	1
Charite E_Sarbeco_F	0	0	0	0	0	0	0	0	0	0	0	0	0	0	0	0	0	0	0	0	0	0	0	0	0	0	0	0	0	0	0
Charite E_Sarbeco_P	0	0	0	0	0	0	0	0	1	0	0	0	0	0	0	0	0	0	0	0	0	1	1	0	0	0	0	0	0	0	3
Charite E_Sarbeco_R*	0	0	0	0	0	0	0	0	0	0	1	0	0	0	0	0	0	0	0	0	0	0	0	0	0	0	0	0	0	0	1
Charite N_Sarbeco_F	1	0	2	1	0	0	0	0	0	0	1	0	0	0	1	0	0	0	0	0	0	0	0	0	0	0	0	0	0	0	6
Charite N_Sarbeco_P	0	0	0	0	0	0	0	0	0	0	0	0	1	0	0	0	0	0	0	0	0	0	1	0	0	0	0	0	0	0	2
Charite N_Sarbeco_R*	0	0	0	0	1	1	0	6	0	0	0	0	6	3	1	0	2	1	0	0	0	0	0	0	0	0	0	0	0	0	19
China CDC ORF1ab-F	0	0	0	0	0	0	0	0	0	0	0	0	0	0	0	0	1	0	0	0	0	0	0	0	0	0	0	0	0	0	1
China CDC ORF1ab-P	1	0	0	0	0	0	0	0	0	0	0	0	0	0	0	0	0	0	0	0	0	0	0	0	0	43	0	0	0	0	44
China CDC ORF1ab-R*	0	0	0	0	0	0	0	0	0	0	0	0	0	0	0	0	1	0	1	0	0	0	0	0	0	0	0	0	0	0	2
China CDC-N_F	358	356	356	0	1	0	5	0	0	0	1	0	1	0	0	2	0	0	1	1	0	0	0	0	0	0	0	0	0	0	369
China CDC-N_P	0	0	0	0	0	0	0	0	0	0	0	0	0	0	0	0	0	0	0	0	0	0	0	0	0	0	0	0	0	0	0
China CDC-N_R*	0	0	2	1	0	1	0	0	0	0	0	1	0	0	0	0	0	2	1	0	0	0	0	0	0	0	0	0	0	0	8
France Pasteur RdRp-IP2_F	0	0	0	0	0	0	0	0	0	0	0	0	0	0	0	0	0	0	0	0	0	0	0	0	0	0	0	0	0	0	0
France Pasteur RdRp-IP2_P	0	0	0	0	0	1	0	0	0	0	0	0	0	0	0	0	0	0	0	0	0	0	0	0	0	0	0	0	0	0	1
France Pasteur RdRp-IP2_R*	0	2	0	0	0	0	0	1	0	0	0	0	0	1	0	0	0	0	0	0	0	0	0	0	0	0	0	0	0	0	4
France Pasteur RdRp-IP4_F	0	0	0	0	0	0	0	0	0	0	0	0	0	0	0	0	0	0	0	0	0	0	0	0	0	0	0	0	0	0	0
France Pasteur RdRp-IP4_P	0	0	0	0	0	0	0	0	0	0	0	0	0	1	0	2	0	1	0	0	0	0	0	0	0	0	0	0	0	0	4
France Pasteur RdRp-IP4_R*	0	0	0	0	0	0	1	0	0	0	0	1	0	0	1	0	2	3	0	0	0	0	0	0	0	0	0	0	0	0	5
France Pasteur-E_F	0	0	0	0	0	0	0	0	0	0	0	0	0	0	0	0	0	0	0	0	0	0	0	0	0	0	0	0	0	0	0
France Pasteur-E_P	0	0	0	0	0	0	0	0	1	0	0	0	0	0	0	0	0	0	0	0	0	1	1	0	0	0	0	0	0	0	3
France Pasteur-E_R*	0	0	0	0	0	0	0	0	0	0	1	0	0	0	0	0	0	0	0	0	0	0	0	0	0	0	0	0	0	0	1
HKU-ORF1bnsp14F	0	0	0	0	0	0	0	0	0	0	5	0	0	0	0	0	0	0	0	0	0	0	0	0	0	0	0	0	0	0	5
HKU-ORF1bnsp14P	0	0	0	0	0	0	0	0	0	0	0	0	0	0	1	0	0	0	0	0	0	0	0	0	0	0	0	0	0	0	1
HKU-ORF1bnsp14R*	0	0	0	0	0	2	0	0	0	1	0	0	0	0	0	1	0	0	2	0	0	0	0	0	0	0	0	0	0	0	6
HKU-N_F	0	0	0	3	1	0	0	1	0	0	0	0	0	0	0	0	0	0	0	0	0	0	0	0	0	0	0	0	0	0	5
HKU-N_P*	0	0	2	0	0	0	0	0	0	0	0	3	0	0	0	0	0	2	1	0	0	0	0	0	0	0	0	0	0	0	8
HKU-N_R*	0	0	0	2	0	0	0	0	2	0	0	1	0	0	2	0	0	6	3	0	0	0	0	0	0	0	0	0	0	0	16
Japan NIID_2019-nCOV-N_F2	0	0	0	1	0	0	0	0	0	0	0	0	1	0	0	4	0	0	0	3	0	0	0	0	0	0	0	0	0	0	7
Japan NIID_2019-nCOV-N_P2	0	0	0	0	0	1	0	1	1	0	0	0	1	0	0	0	0	2	0	0	0	0	0	0	0	0	0	0	0	0	6
Japan NIID_2019-nCOV-N_R2*	0	0	0	1	0	0	0	0	0	2	0	1	0	0	0	0	0	0	0	0	0	0	0	0	0	0	0	0	0	0	4
Thailand NIH WH-NIC N-F	0	0	0	0	0	1	0	0	0	0	0	2	1	0	0	0	0	0	7	0	0	0	0	0	0	0	0	0	0	0	11
Thailand NIH WH-NIC N-P	0	0	0	5	0	0	0	0	0	0	0	0	0	0	0	0	0	0	0	0	0	0	0	0	0	0	0	0	0	0	5
Thailand NIH WH-NIC N-R*	0	0	0	0	0	0	0	0	0	1	3	1	0	0	0	1	0	1	1	0	0	0	0	0	0	0	0	0	0	0	8
US CDC 2019-nCoV_N1-F	0	0	1	1	1	0	0	0	0	0	2	0	0	3	0	0	0	0	3	0	0	0	0	0	0	0	0	0	0	0	10
US CDC 2019-nCoV_N1-P	0	2	20	0	0	0	3	0	0	0	0	0	0	0	0	0	1	0	0	0	0	0	2	1	0	0	0	0	0	0	29
US CDC 2019-nCoV_N1-R*	0	0	0	7	0	2	0	0	0	5	0	0	0	0	0	0	0	0	0	0	0	0	0	0	0	0	0	0	0	0	14
US CDC 2019-nCoV_N2-F	0	0	0	4	0	0	0	0	0	1	0	0	0	0	0	2	0	0	0	0	0	0	0	0	0	0	0	0	0	0	7
US CDC 2019-nCoV_N2-P	3	0	0	0	0	0	2	1	0	1	0	0	3	0	0	0	0	0	0	0	0	0	0	0	0	0	0	0	0	0	9
US CDC 2019-nCoV_N2-R*	0	0	0	0	0	0	0	0	0	0	0	0	0	0	1	0	1	1	0	0	0	0	0	0	0	0	0	0	0	0	3
US CDC 2019-nCoV_N3-F	0	0	0	0	0	0	0	67	0	6	0	0	1	0	0	0	2	0	0	0	0	0	0	0	0	0	0	0	0	0	76
US CDC 2019-nCoV_N3-P	0	1	1	0	2	1	0	0	0	0	0	0	1	0	0	0	1	0	0	0	0	1	0	1	0	0	0	0	0	0	9
US CDC 2019-nCoV_N3-R*	0	0	0	0	0	3	0	5	0	0	0	1	1	0	0	0	0	0	0	0	0	0	0	0	0	0	0	0	0	0	10

## Sheet: Dataset S2
Dataset S2. Calculated mutation rate for each site within the target binding region of primers/probes (n=2257).
total	P1	P2	P3	P4	P5	P6	P7	P8	P9	P10	P11	P12	P13	P14	P15	P16	P17	P18	P19	P20	P21	P22	P23	P24	P25	P26	P27	P28	P29	P30	T
RdRp/Hel_F	0	0	0.000443066	0	0	0	0	0	0	0	0	0	0	0	0	0	0	0	0	0	0	0	0	0	0	0	0	0	0	0	0.000443066
RdRp/Hel_P	0	0	0	0	0	0	0	0	0	0	0	0	0	0.0026584	0	0	0	0.000443066	0	0	0	0	0	0	0	0	0	0	0	0	0.00310146
RdRp/Hel_R*	0	0	0	0	0	0.000443066	0	0	0	0	0	0	0.000443066	0	0.000443066	0	0	0	0	0	0	0	0	0	0	0	0	0	0	0	0.000886132
Chan-N_F	0	0	0.000886132	0	0	0	0	0	0	0	0	0	0	0	0	0	0	0.000443066	0	0	0	0	0	0	0	0	0	0	0	0	0.0013292
Chan-N_P	0	0	0	0	0	0.000443066	0	0	0	0.000443066	0	0	0	0	0	0.000886132	0	0.000443066	0	0	0	0	0	0	0	0	0	0	0	0	0.00221533
Chan-N_R*	0.000443066	0	0	0	0	0	0.000443066	0.00177226	0	0	0	0	0.000886132	0	0	0	0	0.000443066	0	0.0026584	0	0	0	0	0	0	0	0	0	0	0.00664599
Chan-S_F	0	0	0	0	0	0	0	0	0	0	0	0	0	0	0	0	0	0	0	0	0	0	0	0	0	0	0	0	0	0	0
Chan-S_P	0.000886132	0	0	0.000443066	0	0	0.000443066	0	0	0.000443066	0.000443066	0	0	0	0	0	0.000443066	0	0	0	0	0	0	0	0	0	0	0	0	0	0.00221533
Chan-S_R*	0	0	0	0.000443066	0	0	0.000443066	0	0	0.000443066	0	0	0	0	0	0	0.000443066	0	0	0	0	0	0	0	0	0	0	0	0	0	0.000886132
Charite RdRp_SARSr-F	0	0	0	0	0	0	0	0.000443066	0	0	0	0	0	0.000443066	0	0	0	0	0	0	0	0	0	0	0	0	0	0	0	0	0.000886132
Charite RdRp_SARSr-P2	0	0	0	0	0	0	0	0.000443066	0	0	0.000886132	0	0	0	0	0	0	0	0	0	0	0	0	0	0	0	0	0	0	0	0.0013292
Charite RdRp_SARSr-R*	0	0	0	0	0	0	0	0	0	0	0	0	0	0	0.000443066	0	0	0	0	0	0	0	0	0	0	0	0	0	0	0	0.000443066
Charite E_Sarbeco_F	0	0	0	0	0	0	0	0	0	0	0	0	0	0	0	0	0	0	0	0	0	0	0	0	0	0	0	0	0	0	0
Charite E_Sarbeco_P	0	0	0	0	0	0	0	0	0.000443066	0	0	0	0	0	0	0	0	0	0	0	0	0.000443066	0.000443066	0	0	0	0	0	0	0	0.0013292
Charite E_Sarbeco_R*	0	0	0	0	0	0	0	0	0	0	0.000443066	0	0	0	0	0	0	0	0	0	0	0	0	0	0	0	0	0	0	0	0.000443066
Charite N_Sarbeco_F	0.000443066	0	0.000886132	0.000443066	0	0	0	0	0	0	0.000443066	0	0	0	0.000443066	0	0	0	0	0	0	0	0	0	0	0	0	0	0	0	0.0026584
Charite N_Sarbeco_P	0	0	0	0	0	0	0	0	0	0	0	0	0.000443066	0	0	0	0	0	0	0	0	0	0.000443066	0	0	0	0	0	0	0	0.000886132
Charite N_Sarbeco_R*	0	0	0	0	0.000443066	0.000443066	0	0.0026584	0	0	0	0	0.0026584	0.0013292	0.000443066	0	0.000886132	0.000443066	0	0	0	0	0	0	0	0	0	0	0	0	0.00841825
China CDC ORF1ab-F	0	0	0	0	0	0	0	0	0	0	0	0	0	0	0	0	0.000443066	0	0	0	0	0	0	0	0	0	0	0	0	0	0.000443066
China CDC ORF1ab-P	0.000443066	0	0	0	0	0	0	0	0	0	0	0	0	0	0	0	0	0	0	0	0	0	0	0	0	0.0190518	0	0	0	0	0.0194949
China CDC ORF1ab-R*	0	0	0	0	0	0	0	0	0	0	0	0	0	0	0	0	0.000443066	0	0.000443066	0	0	0	0	0	0	0	0	0	0	0	0.000886132
China CDC-N_F	0.158618	0.157732	0.157732	0	0.000443066	0	0.00221533	0	0	0	0.000443066	0	0.000443066	0	0	0.000886132	0	0	0.000443066	0.000443066	0	0	0	0	0	0	0	0	0	0	0.163491
China CDC-N_P	0	0	0	0	0	0	0	0	0	0	0	0	0	0	0	0	0	0	0	0	0	0	0	0	0	0	0	0	0	0	0
China CDC-N_R*	0	0	0.000886132	0.000443066	0	0.000443066	0	0	0	0	0	0.000443066	0	0	0	0	0	0.000886132	0.000443066	0	0	0	0	0	0	0	0	0	0	0	0.00354453
France Pasteur RdRp-IP2_F	0	0	0	0	0	0	0	0	0	0	0	0	0	0	0	0	0	0	0	0	0	0	0	0	0	0	0	0	0	0	0
France Pasteur RdRp-IP2_P	0	0	0	0	0	0.000443066	0	0	0	0	0	0	0	0	0	0	0	0	0	0	0	0	0	0	0	0	0	0	0	0	0.000443066
France Pasteur RdRp-IP2_R*	0	0.000886132	0	0	0	0	0	0.000443066	0	0	0	0	0	0.000443066	0	0	0	0	0	0	0	0	0	0	0	0	0	0	0	0	0.00177226
France Pasteur RdRp-IP4_F	0	0	0	0	0	0	0	0	0	0	0	0	0	0	0	0	0	0	0	0	0	0	0	0	0	0	0	0	0	0	0
France Pasteur RdRp-IP4_P	0	0	0	0	0	0	0	0	0	0	0	0	0	0.000443066	0	0.000886132	0	0.000443066	0	0	0	0	0	0	0	0	0	0	0	0	0.00177226
France Pasteur RdRp-IP4_R*	0	0	0	0	0	0	0.000443066	0	0	0	0	0.000443066	0	0	0.000443066	0	0.000886132	0.0013292	0	0	0	0	0	0	0	0	0	0	0	0	0.00221533
France Pasteur-E_F	0	0	0	0	0	0	0	0	0	0	0	0	0	0	0	0	0	0	0	0	0	0	0	0	0	0	0	0	0	0	0
France Pasteur-E_P	0	0	0	0	0	0	0	0	0.000443066	0	0	0	0	0	0	0	0	0	0	0	0	0.000443066	0.000443066	0	0	0	0	0	0	0	0.0013292
France Pasteur-E_R*	0	0	0	0	0	0	0	0	0	0	0.000443066	0	0	0	0	0	0	0	0	0	0	0	0	0	0	0	0	0	0	0	0.000443066
HKU-ORF1bnsp14F	0	0	0	0	0	0	0	0	0	0	0.00221533	0	0	0	0	0	0	0	0	0	0	0	0	0	0	0	0	0	0	0	0.00221533
HKU-ORF1bnsp14P	0	0	0	0	0	0	0	0	0	0	0	0	0	0	0.000443066	0	0	0	0	0	0	0	0	0	0	0	0	0	0	0	0.000443066
HKU-ORF1bnsp14R*	0	0	0	0	0	0.000886132	0	0	0	0.000443066	0	0	0	0	0	0.000443066	0	0	0.000886132	0	0	0	0	0	0	0	0	0	0	0	0.0026584
HKU-N_F	0	0	0	0.0013292	0.000443066	0	0	0.000443066	0	0	0	0	0	0	0	0	0	0	0	0	0	0	0	0	0	0	0	0	0	0	0.00221533
HKU-N_P*	0	0	0.000886132	0	0	0	0	0	0	0	0	0.0013292	0	0	0	0	0	0.000886132	0.000443066	0	0	0	0	0	0	0	0	0	0	0	0.00354453
HKU-N_R*	0	0	0	0.000886132	0	0	0	0	0.000886132	0	0	0.000443066	0	0	0.000886132	0	0	0.0026584	0.0013292	0	0	0	0	0	0	0	0	0	0	0	0.00708906
Japan NIID_2019-nCOV-N_F2	0	0	0	0.000443066	0	0	0	0	0	0	0	0	0.000443066	0	0	0.00177226	0	0	0	0.0013292	0	0	0	0	0	0	0	0	0	0	0.00310146
Japan NIID_2019-nCOV-N_P2	0	0	0	0	0	0.000443066	0	0.000443066	0.000443066	0	0	0	0.000443066	0	0	0	0	0.000886132	0	0	0	0	0	0	0	0	0	0	0	0	0.0026584
Japan NIID_2019-nCOV-N_R2*	0	0	0	0.000443066	0	0	0	0	0	0.000886132	0	0.000443066	0	0	0	0	0	0	0	0	0	0	0	0	0	0	0	0	0	0	0.00177226
Thailand NIH WH-NIC N-F	0	0	0	0	0	0.000443066	0	0	0	0	0	0.000886132	0.000443066	0	0	0	0	0	0.00310146	0	0	0	0	0	0	0	0	0	0	0	0.00487373
Thailand NIH WH-NIC N-P	0	0	0	0.00221533	0	0	0	0	0	0	0	0	0	0	0	0	0	0	0	0	0	0	0	0	0	0	0	0	0	0	0.00221533
Thailand NIH WH-NIC N-R*	0	0	0	0	0	0	0	0	0	0.000443066	0.0013292	0.000443066	0	0	0	0.000443066	0	0.000443066	0.000443066	0	0	0	0	0	0	0	0	0	0	0	0.00354453
US CDC 2019-nCoV_N1-F	0	0	0.000443066	0.000443066	0.000443066	0	0	0	0	0	0.000886132	0	0	0.0013292	0	0	0	0	0.0013292	0	0	0	0	0	0	0	0	0	0	0	0.00443066
US CDC 2019-nCoV_N1-P	0	0.000886132	0.00886132	0	0	0	0.0013292	0	0	0	0	0	0	0	0	0	0.000443066	0	0	0	0	0	0.000886132	0.000443066	0	0	0	0	0	0	0.0128489
US CDC 2019-nCoV_N1-R*	0	0	0	0.00310146	0	0.000886132	0	0	0	0.00221533	0	0	0	0	0	0	0	0	0	0	0	0	0	0	0	0	0	0	0	0	0.00620292
US CDC 2019-nCoV_N2-F	0	0	0	0.00177226	0	0	0	0	0	0.000443066	0	0	0	0	0	0.000886132	0	0	0	0	0	0	0	0	0	0	0	0	0	0	0.00310146
US CDC 2019-nCoV_N2-P	0.0013292	0	0	0	0	0	0.000886132	0.000443066	0	0.000443066	0	0	0.0013292	0	0	0	0	0	0	0	0	0	0	0	0	0	0	0	0	0	0.00398759
US CDC 2019-nCoV_N2-R*	0	0	0	0	0	0	0	0	0	0	0	0	0	0	0.000443066	0	0.000443066	0.000443066	0	0	0	0	0	0	0	0	0	0	0	0	0.0013292
US CDC 2019-nCoV_N3-F	0	0	0	0	0	0	0	0.0296854	0	0.0026584	0	0	0.000443066	0	0	0	0.000886132	0	0	0	0	0	0	0	0	0	0	0	0	0	0.033673
US CDC 2019-nCoV_N3-P	0	0.000443066	0.000443066	0	0.000886132	0.000443066	0	0	0	0	0	0	0.000443066	0	0	0	0.000443066	0	0	0	0	0.000443066	0	0.000443066	0	0	0	0	0	0	0.00398759
US CDC 2019-nCoV_N3-R*	0	0	0	0	0	0.0013292	0	0.00221533	0	0	0	0.000443066	0.000443066	0	0	0	0	0	0	0	0	0	0	0	0	0	0	0	0	0	0.00443066
